# Supplementary material for: The immune factors have complex causal regulation effects on bone mineral density
Source: Frontiers journal article supplement (doi:10.3389/fimmu.2022.959417), 2022-10-20
Supplement: Data_Sheet_1.zip [file TableS2.xlsx]

## Sheet: Table S2
Table S2 MR results of all immune traits identified in MR analysis
Trait type	Panel	Statistical trait name	GWAS Catalog Accession Number	Traits ID	Trait Name	TB-BMD								FN-BMD								LS-BMD								FA-BMD
						PVE	F-statistic	N IVs	BETA	SE	P-value	adjust.P-value		PVE	F-statistic	N IVs	BETA	SE	P-value	adjust.P-value		PVE	F-statistic	N IVs	BETA	SE	P-value	adjust.P-value		PVE	F-statistic	N IVs	BETA	SE	P-value	adjust.P-value
MFI	B cell	Bcells.trait318	GCST90001731	90001731	CD19 on IgD- CD24-									0.09	19.62	32	-0.0147799	0.00751361	0.0491737	0.799
MFI	B cell	Bcells.trait319	GCST90001732	90001732	CD19 on IgD- CD27-									0.0837354	19.6446	29	-0.0260963	0.0113603	0.02161	0.799073
MFI	B cell	Bcells.trait320	GCST90001733	90001733	CD19 on IgD- CD38-	0.13	19.6	43	0.0148258	0.00700128	0.0342099	0.342
MFI	B cell	Bcells.trait322	GCST90001735	90001735	CD19 on IgD- CD38dim																	0.15	19.58	42	-0.0238155	0.00887915	0.00731428	0.238
MFI	B cell	Bcells.trait312	GCST90001728	90001728	CD19 on IgD+ CD38- unsw mem									0.12	19.85	36	0.0105502	0.0053552	0.0488289	0.799
MFI	B cell	Bcells.trait313	GCST90001729	90001729	CD19 on IgD+ CD38br																	0.16	19.63	40	-0.0251953	0.00816955	0.00204202	0.133
MFI	B cell	Bcells.trait314	GCST90001730	90001730	CD19 on IgD+ CD38dim																	0.15	19.63	45	-0.0170398	0.00808281	0.0350181	0.494
MFI	B cell	Bcells.trait327	GCST90001737	90001737	CD19 on naive-mature B cell																	0.15	19.63	47	-0.01248	0.00532511	0.0190977	0.355
MFI	B cell	Bcells.trait331	GCST90001740	90001740	CD19 on sw mem																	0.15	19.57	45	-0.0223683	0.00880908	0.0111094	0.289
MFI	B cell	Bcells.trait333	GCST90001742	90001742	CD19 on transitional																	0.15	19.74	44	-0.0226784	0.00797887	0.00447884	0.194
MFI	B cell	Bcells.trait388	GCST90001753	90001753	CD20 on IgD- CD24-																	0.11	19.57	38	-0.0169279	0.00822154	0.0394965	0.494
MFI	B cell	Bcells.trait418	GCST90001764	90001764	CD24 on CD24+ CD27+																									0.21	19.7	52	-0.0262179	0.0122444	0.0322562	0.524
MFI	B cell	Bcells.trait438	GCST90001765	90001765	CD24 on IgD+ CD24+	0.19	19.58	51	-0.0110741	0.00479722	0.0209743	0.248																		0.19	19.58	48	-0.0303669	0.0114101	0.00778132	0.202
MFI	B cell	Bcells.trait442	GCST90001768	90001768	CD24 on IgD+ CD38br									0.1	19.56	34	-0.0126048	0.00618028	0.0413982	0.799		0.1	19.56	34	-0.0141981	0.00713858	0.0467099	0.494
MFI	B cell	Bcells.trait448	GCST90001771	90001771	CD24 on memory B cell																									0.17	19.59	47	-0.0516336	0.012788	5.4e-05	0.007
MFI	B cell	Bcells.trait453	GCST90001775	90001775	CD25 on B cell	0.21	19.59	50	-0.00929863	0.00391407	0.0175161	0.248
MFI	B cell	Bcells.trait504	GCST90001789	90001789	CD25 on IgD- CD38dim																	0.25	19.6	41	0.020778	0.00853155	0.014874	0.322
MFI	B cell	Bcells.trait511	GCST90001794	90001794	CD25 on IgD+	0.2	19.63	50	-0.00991866	0.00383719	0.00974142	0.193
MFI	B cell	Bcells.trait490	GCST90001778	90001778	CD25 on IgD+ CD24+	0.24	19.61	53	-0.0117549	0.00501261	0.019024	0.248
MFI	B cell	Bcells.trait496	GCST90001784	90001784	CD25 on IgD+ CD38dim																	0.22	19.64	50	0.0140711	0.00455912	0.00202625	0.133
MFI	B cell	Bcells.trait506	GCST90001790	90001790	CD25 on memory B cell	0.32	19.59	61	-0.0147889	0.00484677	0.00227857	0.084		0.31	19.59	57	-0.012341	0.00603941	0.0410124	0.799
MFI	B cell	Bcells.trait508	GCST90001791	90001791	CD25 on naive-mature B cell	0.23	19.57	49	-0.0176812	0.0054676	0.00122153	0.084
MFI	B cell	Bcells.trait509	GCST90001792	90001792	CD25 on unsw mem	0.27	19.61	53	-0.0149427	0.00483726	0.00200779	0.084
MFI	B cell	Bcells.trait536	GCST90001797	90001797	CD27 on CD20- CD38-																									0.07	19.57	25	-0.0305305	0.0146586	0.0372723	0.538
MFI	B cell	Bcells.trait537	GCST90001798	90001798	CD27 on CD24+ CD27+									0.57	19.57	112	0.00690847	0.00293404	0.0185432	0.799
MFI	B cell	Bcells.trait565	GCST90001802	90001802	CD27 on IgD- CD38-	0.36	19.55	78	-0.0108271	0.00465915	0.0201343	0.248																		0.351699	19.5514	76	-0.0239594	0.0121986	0.0495184	0.612881
MFI	B cell	Bcells.trait566	GCST90001803	90001803	CD27 on IgD- CD38br									0.06	19.58	18	0.0413543	0.016943	0.0146549	0.799
MFI	B cell	Bcells.trait567	GCST90001804	90001804	CD27 on IgD- CD38dim	0.54	19.77	100	-0.00995879	0.00388659	0.0103967	0.193
MFI	B cell	Bcells.trait572	GCST90001807	90001807	CD27 on PB/PC	0.07	19.57	24	-0.0220819	0.00780571	0.00467022	0.121
MFI	B cell	Bcells.trait574	GCST90001808	90001808	CD27 on sw mem	0.56	19.61	108	-0.0120948	0.00401215	0.00257372	0.084																		0.54	19.61	102	-0.0295214	0.0109373	0.00695148	0.202
MFI	B cell	Bcells.trait571	GCST90001806	90001806	CD27 on unsw mem																									0.43	19.6	91	-0.027664	0.012047	0.0216567	0.402
MFI	B cell	Bcells.trait597	GCST90001809	90001809	CD38 on CD20-																									0.07	19.62	24	-0.0885595	0.0293382	0.00253965	0.165
MFI	B cell	Bcells.trait643	GCST90001814	90001814	CD38 on IgD- CD38br																									0.05	19.77	17	0.0228628	0.00837181	0.00631573	0.202
MFI	B cell	Bcells.trait644	GCST90001815	90001815	CD38 on IgD- CD38dim									0.15	19.58	40	-0.0113049	0.0054778	0.0390396	0.799
MFI	B cell	Bcells.trait637	GCST90001811	90001811	CD38 on IgD+ CD24-	0.1	19.59	27	-0.0140643	0.00663863	0.0341277	0.342
MFI	B cell	Bcells.trait777	GCST90001822	90001822	IgD on IgD+ CD38-																									0.11	19.59	37	0.046214	0.0195466	0.0180641	0.391
MFI	cDC	Red.660.20.cDC.trait4	GCST90002016	90002016	CCR2 on CD62L+ plasmacytoid DC																	0.18	19.58	43	0.0172296	0.00795394	0.0302981	0.303
MFI	cDC	Red.660.20.cDC.trait6	GCST90002018	90002018	CCR2 on granulocyte	0.0843869	19.6204	27	-0.0192048	0.00692181	0.00552809	0.0855637
MFI	cDC	Red.660.20.cDC.trait5	GCST90002017	90002017	CCR2 on monocyte	0.22	19.61	61	0.0125383	0.00473669	0.00811928	0.086
MFI	cDC	Red.660.20.cDC.trait3	GCST90002015	90002015	CCR2 on plasmacytoid DC																	0.18	19.74	42	0.0181838	0.00795293	0.0222295	0.303
MFI	cDC	Violet.450.50.cDC.trait4	GCST90002090	90002090	CD11c on granulocyte	0.15	19.57	42	0.017202	0.00654245	0.00855637	0.086
MFI	cDC	Violet.450.50.cDC.trait3	GCST90002089	90002089	CD11c on monocyte																									0.12	19.91	30	0.036692	0.015845	0.0205753	0.617
MFI	cDC	Violet.450.50.cDC.trait1	GCST90002087	90002087	CD11c on myeloid DC																	0.19	19.58	54	0.0170417	0.00860382	0.0476229	0.357
MFI	cDC	Blue.670.LP.cDC.trait4	GCST90001906	90001906	CD86 on granulocyte									0.08	19.59	26	0.0240944	0.00849376	0.00455792	0.137		0.0765737	19.5936	26	0.0237553	0.00996484	0.0171297	0.302981
MFI	cDC	Violet.510.50.cDC.trait2	GCST90002104	90002104	HLA DR on myeloid DC	0.3	19.63	68	0.0109257	0.00482607	0.0235812	0.177
MFI	Maturation stages of T cell	Blue.530.30.MT.trait7	GCST90001845	90001845	CD3 on CD45RA- CD4+	0.37	19.6	88	-0.0091239	0.00302568	0.00256564	0.047
MFI	Maturation stages of T cell	Blue.530.30.MT.trait3	GCST90001841	90001841	CD3 on CM CD4+	0.41	19.62	86	-0.00837887	0.00261427	0.00135039	0.047
MFI	Maturation stages of T cell	Blue.530.30.MT.trait5	GCST90001843	90001843	CD3 on EM CD4+																									0.24	19.72	52	0.0295374	0.0123229	0.0165318	0.489
MFI	Maturation stages of T cell	Red.660.20.MT.trait5	GCST90002026	90002026	CD4 on TD CD4+	0.0995522	19.6287	35	-0.0147449	0.00558519	0.00829077	0.102253
MFI	Maturation stages of T cell	Violet.450.50.MT.trait1	GCST90002098	90002098	CD45RA on naive CD4+	0.76	19.68	169	-0.00624351	0.00259502	0.0161302	0.149																		0.7	19.68	156	-0.0166148	0.00748504	0.0264371	0.489
MFI	Maturation stages of T cell	Violet.450.50.MT.trait4	GCST90002101	90002101	CD45RA on TD CD8br	0.1	19.6	30	-0.0167706	0.00825623	0.0422275	0.199
MFI	Maturation stages of T cell	Violet.450.50.MT.trait2	GCST90002099	90002099	CD4RA on TD CD4+	0.17	19.81	51	-0.00742773	0.00367086	0.0430289	0.199
MFI	Maturation stages of T cell	HVEM1000_150630.trait5	GCST90001878	90001878	HVEM on EM CD4+									0.07	19.75	26	-0.0133139	0.00657484	0.0428698	0.824
MFI	Maturation stages of T cell	HVEM1000_150630.trait4	GCST90001877	90001877	HVEM on naive CD4+	0.08	19.72	26	0.0107321	0.005119	0.0360365	0.199
MFI	Maturation stages of T cell	HVEM1000_150630.trait10	GCST90001872	90001872	HVEM on naive CD8br	0.07	19.97	23	0.00979247	0.00473075	0.0384559	0.199
MFI	Maturation stages of T cell	HVEM1000_150630.trait12	GCST90001874	90001874	HVEM on TD CD8br																	0.08	19.66	28	-0.0214742	0.00764005	0.00494286	0.183
MFI	Monocyte	mono.trait44	GCST90002003	90002003	CCR2 on CD14- CD16-																									0.07	19.61	25	-0.0486861	0.022273	0.0288247	0.245
MFI	Monocyte	mono.trait1	GCST90001979	90001979	CD16 on CD14- CD16+ monocyte																									1.39	19.58	204	0.0140628	0.00592612	0.0176431	0.245
MFI	Monocyte	mono.trait22	GCST90001989	90001989	CD40 on CD14- CD16+ monocyte	0.6	19.57	116	0.0102153	0.0029286	0.000486455	0.004										0.59	19.57	111	0.0118803	0.00461758	0.0100868	0.171
MFI	Monocyte	mono.trait10	GCST90001980	90001980	CD40 on CD14+ CD16- monocyte	0.34	19.57	69	0.0178943	0.00402207	8.63e-06	0.00014671		0.34	19.57	67	0.010899	0.0050917	0.0323116	0.275		0.34	19.57	67	0.0154842	0.00588785	0.00854189	0.171		0.333364	19.5655	66	0.0414704	0.0102094	4.87e-05	0.0016558
MFI	Monocyte	mono.trait11	GCST90001981	90001981	CD40 on CD14+ CD16+ monocyte	0.47	19.63	90	0.0164521	0.00340002	1.31e-06	4.454e-05										0.46	19.63	86	0.0128951	0.00559448	0.021168	0.221
MFI	Monocyte	mono.trait17	GCST90001985	90001985	CD40 on monocytes	0.5	19.65	102	0.00994739	0.00278336	0.000351726	0.004
MFI	Monocyte	mono.trait42	GCST90002001	90002001	CD64 on CD14- CD16-									0.08	19.57	26	0.0144619	0.00673622	0.0318019	0.275
MFI	Monocyte	mono.trait48	GCST90002006	90002006	CD64 on monocyte																	0.57	19.6	120	0.0108333	0.00486716	0.0260282	0.221
MFI	Monocyte	mono.trait3	GCST90001994	90001994	CX3CR1 on CD14- CD16-																									0.2	19.66	46	-0.0245916	0.0110424	0.0259468	0.245
MFI	Monocyte	mono.trait35	GCST90001996	90001996	CX3CR1 on CD14+ CD16+ monocyte																	0.24	19.59	59	-0.0137123	0.00661076	0.0380572	0.259
MFI	Monocyte	mono.trait4	GCST90001999	90001999	PDL-1 on CD14- CD16+ monocyte									0.25	19.65	55	-0.0132184	0.00579014	0.0224357	0.275
MFI	Monocyte	mono.trait29	GCST90001993	90001993	PDL-1 on CD14+ CD16- monocyte									0.06	19.65	21	-0.0317555	0.0127774	0.012945	0.275
MFI	Myeloid cell	Violet.450.50.MDSC.trait6	GCST90002096	90002096	CD11b on basophil									0.08	19.79	24	0.0228445	0.00903694	0.0114748	0.105
MFI	Myeloid cell	Violet.450.50.MDSC.trait4	GCST90002095	90002095	CD11b on CD33dim HLA DR-																	0.1	19.71	31	0.018887	0.00846796	0.0257206	0.226
MFI	Myeloid cell	Violet.450.50.MDSC.trait3	GCST90002094	90002094	CD11b on Mo MDSC																	0.08	19.84	22	0.0184826	0.00790926	0.0194481	0.226
MFI	Myeloid cell	Red.660.20.MDSC.trait4	GCST90002021	90002021	CD14 on CD33dim HLA DR+ CD11b+	0.07	19.89	25	-0.01396	0.00580772	0.0162304	0.254
MFI	Myeloid cell	Red.660.20.MDSC.trait3	GCST90002020	90002020	CD14 on CD33br HLA DR+ CD14dim																	0.06	19.67	23	-0.0200432	0.00957533	0.0363301	0.266		0.06	19.67	23	-0.0375606	0.0175252	0.0320942	0.572
MFI	Myeloid cell	Red.660.20.MDSC.trait2	GCST90002019	90002019	CD14 on Mo MDSC									0.06	19.68	24	-0.0166212	0.00622172	0.00755175	0.105
MFI	Myeloid cell	Blue.780.60.MDSC.trait1	GCST90001946	90001946	CD33 on CD14+ monocyte									0.77	19.72	122	-0.00890288	0.00302029	0.00320154	0.105
MFI	Myeloid cell	Blue.780.60.MDSC.trait9	GCST90001957	90001957	CD33 on CD33br HLA DR+ CD14-									0.61	19.88	95	-0.00741921	0.00324667	0.0223024	0.14
MFI	Myeloid cell	Blue.780.60.MDSC.trait10	GCST90001947	90001947	CD33 on CD33br HLA DR+ CD14dim									0.59	19.83	96	-0.00640196	0.00319996	0.0454316	0.182
MFI	Myeloid cell	Blue.780.60.MDSC.trait4	GCST90001953	90001953	CD33 on CD33dim HLA DR-									0.56	19.66	94	-0.00696757	0.00320356	0.0296343	0.163
MFI	Myeloid cell	Blue.780.60.MDSC.trait13	GCST90001949	90001949	CD33 on CD33dim HLA DR+ CD11b-									0.71	19.63	115	-0.00820581	0.003266	0.0119881	0.105
MFI	Myeloid cell	Blue.780.60.MDSC.trait12	GCST90001948	90001948	CD33 on CD33dim HLA DR+ CD11b+									0.79	19.75	126	-0.00861601	0.00310177	0.00547326	0.105		0.79	19.75	126	-0.00983456	0.00361164	0.00646884	0.142
MFI	Myeloid cell	Blue.780.60.MDSC.trait2	GCST90001951	90001951	CD33 on CD66b++ myeloid cell									0.35	19.7	63	-0.00993721	0.00415278	0.0167155	0.123
MFI	Myeloid cell	Blue.780.60.MDSC.trait14	GCST90001950	90001950	CD33 on Gr MDSC									0.18	19.72	40	-0.010612	0.00500017	0.033811	0.165
MFI	Myeloid cell	Blue.780.60.MDSC.trait3	GCST90001952	90001952	CD33 on Mo MDSC									0.51	19.9	82	-0.00720357	0.00351491	0.0404199	0.178
MFI	Myeloid cell	Red.780.60.MDSC.trait7	GCST90002051	90002051	CD45 on basophil																	0.06	19.85	23	-0.0334227	0.0103332	0.00121853	0.054
MFI	Myeloid cell	Red.780.60.MDSC.trait10	GCST90002042	90002042	CD45 on CD33br HLA DR+ CD14-																									0.04	19.65	15	-0.0477396	0.0231581	0.0392584	0.572
MFI	Myeloid cell	Red.780.60.MDSC.trait11	GCST90002043	90002043	CD45 on CD33br HLA DR+ CD14dim	0.05	19.67	20	0.0159362	0.00669788	0.0173462	0.254
MFI	Myeloid cell	Red.780.60.MDSC.trait13	GCST90002044	90002044	CD45 on CD33dim HLA DR+ CD11b-	0.04	19.67	16	0.0408393	0.0114587	0.000365169	0.016
MFI	Myeloid cell	Red.780.60.MDSC.trait1	GCST90002041	90002041	CD45 on lymphocyte																									0.08	19.71	30	-0.0289989	0.0130403	0.0261627	0.572
MFI	Myeloid cell	Blue.530.30.MDSC.trait2	GCST90001837	90001837	CD66b on Gr MDSC																	0.06	19.68	23	-0.019853	0.0087165	0.0227487	0.226
MFI	TBNK	Blue.670.LP.TBNK.trait10	GCST90001910	90001910	CD45 on B cell	0.09	19.59	31	-0.00964343	0.00422343	0.0224117	0.244
MFI	TBNK	Violet.510.50.TBNK.trait2	GCST90002113	90002113	HLA DR on HLA DR+ T cell	0.07	19.59	23	0.0144775	0.00639462	0.0235731	0.244										0.07	19.59	22	0.0193494	0.00948291	0.0413054	0.341
MFI	TBNK	Violet.510.50.TBNK.trait6	GCST90002117	90002117	HLA DR on HLA DR+ NK	0.04	0	269	0.0349216	0.0140493	0.0129317	0.244										0.04	0	269	0.0382206	0.0191104	0.0455017	0.341
MFI	Treg	Blue.670.LP.Treg.trait7	GCST90001932	90001932	CD127 on CD45RA+ CD4+																	0.08	19.62	25	0.0305879	0.0119682	0.0105954	0.417
MFI	Treg	Blue.670.LP.Treg.trait2	GCST90001927	90001927	CD127 on CD8br																	0.0754999	19.5787	27	0.0277594	0.0114329	0.015181	0.41682
MFI	Treg	Blue.670.LP.Treg.trait1	GCST90001922	90001922	CD127 on T cell																	0.06	19.99	22	-0.0327324	0.0146297	0.0252604	0.417
MFI	Treg	Blue.780.60.CD25.trait9	GCST90001943	90001943	CD25 on activated & secreting Treg	0.1	19.76	35	-0.00884565	0.0031366	0.00480034	0.133
MFI	Treg	Blue.780.60.Treg.trait5	GCST90001961	90001961	CD25 on CD39+ CD4+									0.71	19.67	127	0.00771456	0.00370302	0.0372227	0.467
MFI	Treg	Blue.780.60.CD25.trait4	GCST90001938	90001938	CD25 on CD39+ resting Treg									0.06	19.83	23	0.0189966	0.00902966	0.0353961	0.467
MFI	Treg	Blue.780.60.CD25.trait8	GCST90001942	90001942	CD25 on CD39+ secreting Treg									0.09	19.68	29	-0.0120129	0.00569963	0.0350607	0.467
MFI	Treg	Blue.780.60.CD25.trait13	GCST90001934	90001934	CD25 on CD45RA+ CD4 not Treg									0.09	19.59	31	-0.0216953	0.00748915	0.00376867	0.313
MFI	Treg	Blue.780.60.CD25.trait3	GCST90001937	90001937	CD25 on resting Treg	0.09	19.6	32	-0.0269815	0.0072843	0.000212175	0.009
MFI	Treg	Blue.780.60.CD25.trait7	GCST90001941	90001941	CD25 on secreting Treg	0.08	19.69	27	-0.0162298	0.00614038	0.00821435	0.162
MFI	Treg	Blue.585.42.Treg.trait13	GCST90001889	90001889	CD28 on activated & secreting Treg	0.16	19.6	47	-0.00609941	0.00304017	0.0448273	0.49
MFI	Treg	Blue.585.42.Treg.trait10	GCST90001886	90001886	CD28 on CD39+ activated Treg	0.16	19.69	45	-0.0114245	0.00463553	0.013719	0.19										0.15	19.69	43	-0.013387	0.00660844	0.0427905	0.507
MFI	Treg	Blue.585.42.Treg.trait8	GCST90001901	90001901	CD28 on CD39+ resting Treg																									0.08	19.63	25	-0.0199352	0.0100961	0.0483207	0.819
MFI	Treg	Red.660.20.Treg.trait1	GCST90002029	90002029	CD39 on CD39+ CD8br									0.25	19.59	59	-0.0138257	0.00652298	0.0340457	0.467		0.25	19.59	58	-0.019979	0.00767675	0.00925369	0.417
MFI	Treg	Red.660.20.Treg.trait3	GCST90002031	90002031	CD39 on CD39+ secreting Treg	1.34	19.64	207	-0.00603351	0.00233496	0.00976665	0.162		1.33	19.64	202	-0.00619971	0.0030094	0.0393872	0.467
MFI	Treg	Red.780.60.Treg.trait5	GCST90002066	90002066	CD4 on activated Treg																									0.08	19.64	28	-0.0306182	0.0102164	0.00272679	0.226
MFI	Treg	Red.780.60.Treg.trait16	GCST90002062	90002062	CD4 on CD28+ CD4+									0.06	19.76	23	-0.0284975	0.0115982	0.014008	0.467										0.06	19.76	23	-0.0486466	0.0234622	0.038135	0.819
MFI	Treg	Red.780.60.Treg.trait8	GCST90002069	90002069	CD4 on CD39+ secreting Treg																	0.11	19.59	33	-0.0139924	0.00645298	0.0301316	0.417
MFI	Treg	Red.780.60.Treg.trait7	GCST90002068	90002068	CD4 on secreting Treg																	0.1	19.59	34	-0.0181664	0.00832571	0.029112	0.417
MFI	Treg	Violet.450.50.Treg.trait3	GCST90002103	90002103	CD45RA on CD39+ resting Treg	0.11	19.66	37	-0.0224157	0.00542642	3.61e-05	0.003
Absolute count	B cell	BC_Trait40	GCST90001421	90001421	CD20- AC																	0.08	19.6	29	0.0207025	0.0102159	0.0427137	0.214		0.08	19.6	29	-0.0423284	0.0175375	0.0157957	0.105
Absolute count	B cell	BC_Trait44	GCST90001423	90001423	CD20- CD38- AC									0.06	19.61	21	0.027541	0.0108703	0.0112898	0.126		0.06	19.61	21	0.0402058	0.0125561	0.00136437	0.027
Absolute count	B cell	BC_Trait6	GCST90001438	90001438	IgD- CD38dim AC																	0.07	19.63	26	0.0220177	0.00989721	0.0261056	0.214
Absolute count	B cell	BC_Trait12	GCST90001394	90001394	IgD+ CD38dim AC																									0.11	19.63	38	-0.0213732	0.00861112	0.0130631	0.105
Absolute count	B cell	BC_Trait26	GCST90001407	90001407	Memory B cell AC									0.06	19.77	20	0.0237757	0.00952516	0.0125568	0.126		0.06	19.77	20	0.0235055	0.0110807	0.0338969	0.214		0.06	19.77	20	0.0455692	0.0184712	0.0136237	0.105
Absolute count	cDC	DC_Trait530	GCST90001452	90001452	CD11c+ CD62L- monocyte AC	0.09	19.61	33	0.0153447	0.00604228	0.0110996	0.148		0.09	19.61	34	0.0192367	0.00842053	0.0223424	0.104		0.09	19.61	34	0.0184735	0.00794443	0.0200537	0.156
Absolute count	cDC	f_DC_Trait520	GCST90001472	90001472	CD62L- CD86+ myeloid DC AC									0.64	19.65	98	0.0150442	0.0043621	0.000562992	0.008		0.64	19.65	98	0.011551	0.00506136	0.0224773	0.156
Absolute count	cDC	f_DC_Trait508	GCST90001462	90001462	CD62L- DC AC																									0.43	19.58	68	-0.0229701	0.00835612	0.00597973	0.042
Absolute count	cDC	DC_Trait532	GCST90001454	90001454	CD62L- HLA DR++ monocyte AC																									0.06	19.59	23	0.0432266	0.0205931	0.0358098	0.167
Absolute count	cDC	f_DC_Trait512	GCST90001464	90001464	CD86+ myeloid DC AC									0.48	19.63	78	0.0134235	0.00494567	0.0066436	0.047		0.48	19.63	78	0.012201	0.00573651	0.0334274	0.156
Absolute count	cDC	f_DC_Trait514	GCST90001466	90001466	CD86+ plasmacytoid DC AC	0.07	19.78	26	-0.0200941	0.00871254	0.0210917	0.148
Absolute count	cDC	f_DC_Trait502	GCST90001458	90001458	Myeloid DC AC																									0.35	19.58	66	-0.0272939	0.00954688	0.00425066	0.042
Absolute count	Maturation stages of T cell	MT_ry_Trait514	GCST90001534	90001534	CD45RA- CD4+ AC	0.07	19.6	23	0.0110008	0.00539849	0.0415747	0.154
Absolute count	Maturation stages of T cell	MT_Trait542	GCST90001563	90001563	CM DN (CD4-CD8-) AC	0.02	19.56	9	-0.0111278	0.0024576	5.96e-06	0.00016688		0.02	19.56	8	0.0205792	0.00914339	0.0244034	0.171
Absolute count	Maturation stages of T cell	MT_Trait508	GCST90001542	90001542	EM CD4+ AC	0.1	19.66	33	0.0213146	0.00498825	1.93e-05	0.0002702		0.09	19.66	31	0.0145361	0.00598005	0.0150672	0.171
Absolute count	Maturation stages of T cell	MT_Trait528	GCST90001554	90001554	EM CD8br AC	0.09	19.57	31	0.0102806	0.0051062	0.0440764	0.154
Absolute count	Maturation stages of T cell	MT_Trait506	GCST90001540	90001540	Naive CD4+ AC																	0.08	19.61	31	0.0222151	0.00976528	0.0229114	0.321
Absolute count	Monocyte	N_MONO_Trait501	GCST90001579	90001579	CD14- CD16+ monocyte AC																									0.14	19.78	34	0.0359607	0.0159763	0.0243935	0.122
Absolute count	Monocyte	N_MONO_Trait507	GCST90001582	90001582	CD14+ CD16- monocyte AC	0.1	19.58	36	0.0113975	0.00543455	0.0359728	0.18
Absolute count	Myeloid cell	MDSC_Trait23	GCST90001523	90001523	CD33- HLA DR+ AC									0.21	19.63	63	0.0073488	0.00364595	0.0438409	0.476
Absolute count	Myeloid cell	MDSC_Trait13	GCST90001518	90001518	CD33br HLA DR+ CD14- AC	0.15	19.63	51	-0.0214071	0.00503653	2.13e-05	0.0002982
Absolute count	TBNK	TB_Trait521	GCST90001609	90001609	CD4+ CD8dim AC	0.14	19.56	36	0.0148068	0.00647779	0.0222669	0.285		0.12	19.56	31	0.0183273	0.00852859	0.0316408	0.684
Absolute count	TBNK	TB_ry_Trait524	GCST90001596	90001596	CD8dim AC	0.15	19.58	46	-0.0136018	0.00660809	0.0395554	0.303
Absolute count	TBNK	TB_Trait551	GCST90001633	90001633	CD8dim NKT AC	0.25	19.58	66	-0.0144549	0.00644061	0.0248104	0.285
Absolute count	TBNK	TB_Trait533	GCST90001615	90001615	TCRgd AC																									0.07	19.61	27	0.0354303	0.0178212	0.0468005	0.531
Absolute count	Treg	f_Treg_Trait521	GCST90001498	90001498	Activated & resting Treg AC	0.08	20	27	-0.0260878	0.00832404	0.0017242	0.014
Absolute count	Treg	f_Treg_Trait509	GCST90001486	90001486	Activated Treg AC	0.0800157	19.5698	28	0.0142501	0.00676386	0.0351347	0.122971
Absolute count	Treg	f_Treg_Trait539	GCST90001510	90001510	CD25hi CD45RA- CD4 not Treg AC	0.13	19.57	40	0.0133262	0.00430789	0.00197841	0.014
Absolute count	Treg	f_Treg_Trait536	GCST90001507	90001507	CD25hi CD45RA+ CD4 not Treg AC	0.23	19.64	59	-0.00985382	0.00405018	0.014977	0.07		0.21	19.64	54	-0.00849331	0.00430351	0.0484295	0.414
Absolute count	Treg	Treg_Trait602	GCST90001687	90001687	CD28- CD8br AC																	0.0549767	20.0782	19	-0.0347747	0.0177083	0.0495583	0.231272
Absolute count	Treg	f_Treg_Trait512	GCST90001489	90001489	CD39+ activated Treg AC	1.2	19.59	200	-0.00635496	0.00267927	0.0176969	0.071										1.18	19.59	191	-0.0136236	0.00461992	0.0031892	0.049		0.99	19.59	187	0.0178795	0.00761985	0.0189537	0.531
Absolute count	Treg	Treg_Trait514	GCST90001660	90001660	CD39+ CD4+ AC									0.72	0	96	-0.00951245	0.00466965	0.0416421	0.414		0.72	0	96	-0.0143816	0.00635188	0.0235654	0.155
Absolute count	Treg	Treg_Trait587	GCST90001672	90001672	CD39+ CD8br AC	1.68	19.57	245	0.0243232	0.00813974	0.00280618	0.0196433										1.6	19.57	234	-0.00959551	0.00343585	0.00522607	0.049
Absolute count	Treg	f_Treg_Trait506	GCST90001483	90001483	CD39+ resting Treg AC	1.13	19.61	175	0.00828317	0.00268037	0.00199951	0.028
Absolute count	Treg	f_Treg_Trait518	GCST90001495	90001495	CD39+ secreting Treg AC																	1.44	19.57	219	-0.01013	0.00352974	0.00410608	0.049
Absolute count	Treg	Treg_Trait706	GCST90001698	90001698	CD45RA+ CD28- CD8br AC																	16.88	19.57	3008	-4e-06	1.82e-06	0.0276759	0.154985
Absolute count	Treg	f_Treg_Trait503	GCST90001480	90001480	Resting Treg AC	0.21	19.58	58	-0.00653736	0.00241033	0.0066833	0.037
Relative count	B cell	BC_Trait19	GCST90001399	90001399	IgD- CD27- %B cell	0.15	19.68	38	0.012494	0.00604856	0.0388648	0.492
Relative count	B cell	BC_Trait3	GCST90001410	90001410	IgD- CD38br %B cell																	0.07	19.62	25	0.038016	0.0137266	0.00561409	0.225
Relative count	B cell	BC_Trait31	GCST90001411	90001411	IgD+ CD24+ %B cell																	0.07	19.63	27	-0.0319331	0.0144277	0.0268755	0.403
Relative count	B cell	BC_Trait48	GCST90001426	90001426	IgD- CD38dim %lymphocyte	0.12	19.57	42	0.0122907	0.00535926	0.0218271	0.492
Relative count	B cell	BC_Trait5	GCST90001428	90001428	IgD- CD38dim %B cell	0.104849	19.5769	38	0.00902306	0.00459133	0.0493867	0.492355
Relative count	B cell	BC_Trait58	GCST90001436	90001436	Memory B cell %lymphocyte																	0.120196	19.7015	39	0.0180448	0.00851946	0.0341696	0.403333		0.12	19.7	38	0.0323934	0.0144097	0.0245749	0.506
Relative count	B cell	BC_Trait65	GCST90001443	90001443	CD20- %lymphocyte																	0.08	19.55	28	0.0184765	0.00938718	0.0490368	0.403
Relative count	cDC	DC_Trait535	GCST90001457	90001457	CD11c+ HLA DR++ monocyte %monocyte									0.05	19.62	19	-0.014578	0.00659279	0.0270219	0.088
Relative count	cDC	f_DC_Trait503	GCST90001459	90001459	Myeloid DC %DC									0.27	19.75	57	0.0173532	0.00564197	0.00209987	0.014		0.27	19.75	57	0.022036	0.00658782	0.000822925	0.011
Relative count	cDC	f_DC_Trait513	GCST90001465	90001465	CD86+ myeloid DC %DC																	0.49	19.64	86	0.0103493	0.00502402	0.0394024	0.171		0.49	19.64	86	-0.017325	0.00879976	0.0489764	0.312
Relative count	cDC	f_DC_Trait515	GCST90001467	90001467	CD86+ plasmacytoid DC %DC	0.14	19.59	45	-0.0150738	0.00678151	0.0262305	0.341		0.13	19.59	41	-0.0187452	0.00840737	0.0257728	0.088
Relative count	cDC	f_DC_Trait517	GCST90001469	90001469	CD62L- myeloid DC %DC																									0.52	19.59	83	-0.0227677	0.00951893	0.0167643	0.218
Relative count	cDC	f_DC_Trait521	GCST90001473	90001473	CD62L- CD86+ myeloid DC %DC									0.64	19.58	101	0.0143461	0.00429984	0.000848648	0.011		0.64	19.58	101	0.0103006	0.00499873	0.0393363	0.171
Relative count	Maturation stages of T cell	MT_ry_Trait515	GCST90001535	90001535	CD45RA- CD4+ %CD4+	0.18	19.68	55	0.016142	0.00446125	0.000296582	0.004
Relative count	Maturation stages of T cell	MT_Trait504	GCST90001538	90001538	CM CD4+ %CD4+	0.14	19.65	49	0.0119718	0.00317749	0.00016476	0.004																		0.13	19.65	45	0.0168462	0.00772817	0.0292691	0.347
Relative count	Maturation stages of T cell	MT_Trait510	GCST90001544	90001544	EM CD4+ %T cell	0.12	19.69	38	0.0145305	0.00525716	0.00571065	0.04		0.1	19.69	33	0.0126867	0.0061406	0.0388249	0.362
Relative count	Maturation stages of T cell	MT_Trait512	GCST90001546	90001546	TD CD4+ %CD4+	0.08	19.57	26	-0.0235602	0.00739631	0.00144553	0.013
Relative count	Maturation stages of T cell	MT_Trait523	GCST90001549	90001549	CM CD8br %CD8br	0.1	19.58	37	0.00241023	0.00120036	0.0446526	0.12
Relative count	Maturation stages of T cell	MT_Trait529	GCST90001555	90001555	EM CD8br %CD8br	0.21	19.64	53	0.0100062	0.00412964	0.0153917	0.086		0.2	19.64	49	0.0119797	0.00500997	0.0167945	0.343
Relative count	Maturation stages of T cell	MT_Trait530	GCST90001556	90001556	EM CD8br %T cell	0.09	19.6	27	0.0118097	0.00506855	0.019806	0.092
Relative count	Maturation stages of T cell	MT_Trait532	GCST90001558	90001558	TD CD8br %CD8br																	0.25	19.69	61	-0.0101102	0.00501936	0.0439842	0.654		0.25	19.69	60	-0.019999	0.00875234	0.0223135	0.347
Relative count	Maturation stages of T cell	MT_Trait533	GCST90001559	90001559	TD CD8br %T cell									0.14	19.59	38	-0.0146313	0.00650404	0.0244763	0.343
Relative count	Maturation stages of T cell	MT_Trait543	GCST90001564	90001564	CM DN (CD4-CD8-) %DN																									0.05	19.75	18	0.0350304	0.0168128	0.0372001	0.347
Relative count	Maturation stages of T cell	MT_Trait544	GCST90001565	90001565	CM DN (CD4-CD8-) %T cell	0.07	19.6	25	0.0121041	0.0059474	0.0418313	0.12
Relative count	Maturation stages of T cell	MT_Trait546	GCST90001567	90001567	Naive DN (CD4-CD8-) %DN	0.11	19.62	39	0.0101038	0.00466871	0.0304533	0.12
Relative count	Maturation stages of T cell	MT_Trait552	GCST90001573	90001573	TD DN (CD4-CD8-) %DN	0.14	19.87	38	-0.00986401	0.00488351	0.0433979	0.12
Relative count	Maturation stages of T cell	MT_Trait553	GCST90001574	90001574	TD DN (CD4-CD8-) %T cell	0.12	19.63	39	-0.00786687	0.00396574	0.0472884	0.12
Relative count	Monocyte	N_MONO_Trait515	GCST90001585	90001585	CD14+ CD16+ monocyte %monocyte																									0.42	19.6	77	0.0371093	0.0118869	0.00179716	0.007
Relative count	TBNK	TB_Trait520	GCST90001608	90001608	DP (CD4+CD8+) %leukocyte																									0.11	19.72	32	0.0433043	0.0183082	0.0180159	0.27
Relative count	TBNK	TB_Trait534	GCST90001616	90001616	TCRgd %T cell									0.06	19.61	23	-0.0195082	0.00799396	0.0146725	0.66										0.06	19.61	22	0.0339297	0.0164812	0.0395238	0.356
Relative count	TBNK	TB_Trait535	GCST90001617	90001617	TCRgd %lymphocyte																									0.06	19.79	21	0.0299608	0.0142375	0.0353473	0.356
Relative count	TBNK	TB_Trait537	GCST90001619	90001619	HLA DR+ T cell%T cell	0.23	19.64	63	0.00893125	0.00426988	0.0364668	0.693
Relative count	TBNK	TB_Trait552	GCST90001634	90001634	CD8dim NKT %T cell																	0.25	19.78	61	-0.019189	0.00915676	0.0361164	0.789
Relative count	TBNK	TB_Trait570	GCST90001649	90001649	HLA DR+ NK %NK																	0.39	19.59	78	-0.013809	0.00633047	0.0291574	0.789		0.39	19.59	76	0.0295189	0.0111266	0.00797774	0.27
Relative count	TBNK	TB_Trait571	GCST90001650	90001650	HLA DR+ NK %CD3- lymphocyte																									0.42	19.56	79	0.0271521	0.0110337	0.0138614	0.27
Relative count	Treg	f_Treg_Trait501	GCST90001478	90001478	CD4 Treg %CD4									0.1	19.62	31	-0.0242412	0.0099803	0.0151447	0.141
Relative count	Treg	f_Treg_Trait504	GCST90001481	90001481	Resting Treg % CD4 Treg	0.6	19.61	120	-0.00898642	0.00311895	0.00396118	0.024
Relative count	Treg	f_Treg_Trait505	GCST90001482	90001482	Resting Treg %CD4	0.39	19.57	86	-0.0131108	0.00327901	6.38e-05	0.002
Relative count	Treg	f_Treg_Trait507	GCST90001484	90001484	CD39+ resting Treg %resting Treg	1.37	19.59	199	-0.00583081	0.00250361	0.0198611	0.07		1.32	19.59	189	-0.00878592	0.00320162	0.00606572	0.141
Relative count	Treg	f_Treg_Trait508	GCST90001485	90001485	CD39+ resting Treg % CD4 Treg	1.28	19.59	192	-0.00743259	0.00178644	3.17e-05	0.002
Relative count	Treg	f_Treg_Trait510	GCST90001487	90001487	Activated Treg %CD4 Treg	0.13	19.91	42	0.0174239	0.00529886	0.00100817	0.009
Relative count	Treg	f_Treg_Trait513	GCST90001490	90001490	CD39+ activated Treg %activated Treg									2.19	19.61	301	-0.0052119	0.0025532	0.0412189	0.21		2.18	19.61	298	-0.00705281	0.00295091	0.0168463	0.222
Relative count	Treg	f_Treg_Trait514	GCST90001491	90001491	CD39+ activated Treg %CD4 Treg									1.29	19.62	204	-0.00916204	0.00314657	0.00359406	0.141		1.28	19.62	203	-0.0106342	0.00412539	0.00994463	0.222
Relative count	Treg	f_Treg_Trait516	GCST90001493	90001493	Secreting Treg % CD4 Treg	0.45	19.66	90	0.0104014	0.00314603	0.000945766	0.009
Relative count	Treg	f_Treg_Trait517	GCST90001494	90001494	Secreting Treg %CD4									0.27	19.56	64	0.00520024	0.00231972	0.0249776	0.175
Relative count	Treg	f_Treg_Trait519	GCST90001496	90001496	CD39+ secreting Treg %secreting Treg									1.69	19.61	255	-0.00569592	0.00274362	0.0378881	0.21		1.68	19.61	253	-0.00739078	0.00317257	0.0198281	0.222
Relative count	Treg	f_Treg_Trait520	GCST90001497	90001497	CD39+ secreting Treg %CD4 Treg	1.65	19.65	245	-0.00508248	0.00221285	0.0216301	0.071		1.62	19.65	238	-0.00595907	0.00271441	0.0281386	0.175		1.62	19.65	238	-0.0073242	0.00337272	0.0298859	0.239
Relative count	Treg	f_Treg_Trait522	GCST90001499	90001499	Activated & resting Treg % CD4 Treg	0.44	19.55	87	-0.0110235	0.0031368	0.000440983	0.008
Relative count	Treg	f_Treg_Trait523	GCST90001500	90001500	Activated & resting Treg %CD4+	0.22	19.61	62	-0.0121491	0.00439293	0.00568165	0.025																		0.21	19.61	60	-0.0314943	0.0109501	0.00402525	0.225
Relative count	Treg	f_Treg_Trait534	GCST90001505	90001505	CD25hi %CD4+									0.12	19.57	37	-0.0232821	0.0091404	0.0108602	0.141
Relative count	Treg	f_Treg_Trait537	GCST90001508	90001508	CD25hi CD45RA+ CD4 not Treg %CD4+	0.31	19.61	74	-0.00901314	0.00304224	0.00304986	0.021		0.28	19.61	70	-0.00722855	0.00296667	0.0148267	0.141
Relative count	Treg	f_Treg_Trait538	GCST90001509	90001509	CD25hi CD45RA+ CD4 not Treg %T cell	0.26	19.58	66	-0.00692371	0.00286775	0.0157641	0.059
Relative count	Treg	f_Treg_Trait540	GCST90001511	90001511	CD25hi CD45RA- CD4 not Treg %CD4+	0.16	19.59	46	0.0134762	0.00475154	0.00456585	0.024
Relative count	Treg	Treg_Trait507	GCST90001655	90001655	CD28+ DN (CD4-CD8-) %T cell																	0.07	19.59	26	0.0105087	0.00526431	0.0459111	0.286
Relative count	Treg	Treg_Trait512	GCST90001658	90001658	CD39+ CD4+ %T cell	1.82	19.66	274	-0.00592385	0.00209177	0.00462609	0.024										1.77	19.66	267	-0.00716069	0.0032865	0.0293451	0.239
Relative count	Treg	Treg_Trait513	GCST90001659	90001659	CD39+ CD4+ %CD4+	1.93	19.65	290	-0.00736489	0.00223615	0.00098929	0.009		1.85	19.65	274	-0.00648005	0.0028538	0.0231666	0.175		1.85	19.65	274	-0.00896114	0.00357384	0.0121616	0.222
Relative count	Treg	Treg_Trait585	GCST90001670	90001670	CD39+ CD8br %T cell	1.74	19.63	254	-0.00742416	0.00235097	0.00158901	0.013										1.66	19.63	241	-0.00882434	0.00350745	0.0118735	0.222
Relative count	Treg	Treg_Trait586	GCST90001671	90001671	CD39+ CD8br %CD8br	1.66	19.58	241	-0.00647074	0.00234663	0.00582508	0.025										1.59	19.58	230	-0.00716748	0.00350182	0.040679	0.285
Relative count	Treg	Treg_Trait592	GCST90001677	90001677	CD28- CD25++ CD8br %CD8br	0.1	19.61	35	-0.0207938	0.00826449	0.0118681	0.047
Relative count	Treg	Treg_Trait597	GCST90001682	90001682	CD127- CD8br %T cell									0.04	19.65	15	-0.0312548	0.0120345	0.00940169	0.141
Relative count	Treg	Treg_Trait708	GCST90001700	90001700	CD45RA+ CD28- CD8br %T cell																									2.34	19.57	602	-0.000363285	0.000138398	0.00866648	0.243
Morphological parameter	cDC	FSC.cDC.trait5	GCST90001966	90001966	FSC-A on granulocyte																	0.13	19.68	37	0.00686082	0.00312166	0.0279627	0.065
Morphological parameter	cDC	SSC.cDC.trait4	GCST90002073	90002073	SSC-A on monocyte	0.63	19.6	122	0.0117498	0.00331028	0.000385968	0.003		0.57	19.6	115	0.0133336	0.00484721	0.00594554	0.042		0.57	19.6	115	0.0161294	0.00555419	0.00368427	0.013
Morphological parameter	cDC	SSC.cDC.trait2	GCST90002071	90002071	SSC-A on myeloid DC									0.37	19.78	73						0.12	19.6	34	0.0288563	0.00930591	0.00192965	0.013
Morphological parameter	TBNK	FSC.TBNK.trait4	GCST90001973	90001973	FSC-A on CD4+																									0.07	19.59	27	-0.0254877	0.0125045	0.041522	0.475
Morphological parameter	TBNK	FSC.TBNK.trait6	GCST90001975	90001975	FSC-A on HLA DR+ T cell																	0.07	19.63	25	-0.027617	0.0103845	0.0078266	0.098
Morphological parameter	TBNK	SSC.TBNK.trait1	GCST90002074	90002074	SSC-A on CD14+ monocyte	0.41	19.64	79	0.00912594	0.00464187	0.0492983	0.669		0.37	19.78	73	0.0177604	0.0058872	0.00255476	0.064		0.37	19.78	73	0.0270343	0.00683337	7.61e-05	0.0019025
Morphological parameter	TBNK	SSC.TBNK.trait12	GCST90002077	90002077	SSC-A on HLA DR+ NK																	0.27	19.58	62	-0.0124323	0.00587454	0.0343194	0.214
Morphological parameter	TBNK	SSC.TBNK.trait3	GCST90002080	90002080	SSC-A on T cell																	0.09	19.63	31	-0.015924	0.00686005	0.0202726	0.169		0.09	19.63	31	0.0297593	0.0118597	0.0120981	0.302
Significance threshold (=adjust.P-value) was determined by adjusting the nominal P-values (0.05) with the false discovery rate (FDR) correction.
Significant and robust MR results are reported in bold.
TB = total body,FN = femoral neck, LS = lumbar spine, FA = forearm, BMD= bone mineral density.
PVE = phenotypic variation explained, IV= instrumental variables, SE= standard error.
