# Supplementary material for: The immune factors have complex causal regulation effects on bone mineral density
Source: Frontiers journal article supplement (doi:10.3389/fimmu.2022.959417), 2022-10-20
Supplement: Data_Sheet_1.zip [file TableS7.xlsx]

## Sheet: Table S7
Table S7. MR estimates from main methods after removing possible outliers
ID	Phenotype	Traits ID	Trait		BETA	SE	Down	Up	Estimate (95%CI)	P	Heter.est	Heter.P	MR-PRESSO Global test RSSobs	MR-PRESSO Global test.P	Removed SNPs
591	TB-BMD	90001981	CD40 on CD14+ CD16+ monocyte	IVW_fix	0.0227933	0.00381351	0.015319	0.0302677	0.023 (0.015, 0.03)	2.27292e-09	69.671	0.90012	70.978	0.914	rs60072425, rs62026614, rs72749639
				IVW_random	0.0227933	0.00381351	0.015319	0.0302677	0.023 (0.015, 0.03)	2.27292e-09
				Egger_slope	0.0137342	0.00698899	3.60685e-05	0.0274324	0.014 (0, 0.027)	0.0493998
				Egger_intercept	0.00321098	0.00207596	-0.000857826	0.0072798	0.003 (-0.001, 0.007)	0.121925
				Weighted_Median	0.017053	0.00591432	0.00546115	0.0286449	0.017 (0.005, 0.029)	0.00393479
595	TB-BMD	90001985	CD40 on monocytes	IVW_fix	0.0185169	0.00381961	0.0110306	0.0260032	0.019 (0.011, 0.026)	1.24803e-06	65.5413	0.990852	66.6756	0.992	rs11699356, rs139875028, rs144062689, rs6816965, rs745307, rs78882596
				IVW_random	0.0185169	0.00381961	0.0110306	0.0260032	0.019 (0.011, 0.026)	1.24803e-06
				Egger_slope	0.016785	0.00644945	0.00414437	0.0294257	0.017 (0.004, 0.029)	0.00925315
				Egger_intercept	0.000626788	0.00188078	-0.00305948	0.00431305	0.001 (-0.003, 0.004)	0.738939
				Weighted_Median	0.0151536	0.00589989	0.00359004	0.0267172	0.015 (0.004, 0.027)	0.0102152
451	TB-BMD	90001841	CD3 on CM CD4+	IVW_fix	0.00120583	0.00261427	-0.00391804	0.0063297	0.001 (-0.004, 0.006)	0.64462	110.507	0.0329545	101.027	0.143	rs10154049, rs6707204, rs6722486, rs73068530
				IVW_random	0.00120583	0.00298082	-0.00463648	0.00704814	0.001 (-0.005, 0.007)	0.685824
				Egger_slope	-0.00131384	0.00372841	-0.00872818	0.0061005	-0.001 (-0.009, 0.006)	0.725431
				Egger_intercept	0.00189023	0.00168462	-0.00145983	0.00524029	0.002 (-0.001, 0.005)	0.265038
				Weighted_Median	-0.00217226	0.00476919	-0.0115197	0.00717518	-0.002 (-0.012, 0.007)	0.648766
455	TB-BMD	90001845	CD3 on CD45RA- CD4+	IVW_fix	0.00628891	0.00473248	-0.00298657	0.0155644	0.006 (-0.003, 0.016)	0.183886	67.0526	0.610782	93.8861	0.331	rs62423936, rs73068530
				IVW_random	0.00628891	0.00473248	-0.00298657	0.0155644	0.006 (-0.003, 0.016)	0.183886
				Egger_slope	0.00405348	0.00796342	-0.0115545	0.0196615	0.004 (-0.012, 0.02)	0.610743
				Egger_intercept	0.000724652	0.00207617	-0.00334458	0.00479388	0.001 (-0.003, 0.005)	0.727065
				Weighted_Median	0.000314856	0.00763808	-0.0146555	0.0152852	0 (-0.015, 0.015)	0.967119
156	TB-BMD	90001546	TD CD4+ %CD4+	IVW_fix	-0.0195383	0.00598323	-0.0312652	-0.00781133	-0.02 (-0.031, -0.008)	0.00109271	73.8613	0.107661	37.7146	0.062	rs145970654, rs597606, rs887467
				IVW_random	-0.0195383	0.00663848	-0.0325494	-0.00652707	-0.02 (-0.033, -0.007)	0.00324858
				Egger_slope	-0.0302528	0.0128465	-0.0559586	-0.0045469	-0.03 (-0.056, -0.005)	0.0218718
				Egger_intercept	0.00264074	0.00271028	-0.00278252	0.008064	0.003 (-0.003, 0.008)	0.333865
				Weighted_Median	-0.0244885	0.00975325	-0.0436045	-0.00537245	-0.024 (-0.044, -0.005)	0.0120458
683	TB-BMD	90002073	SSC-A on monocyte	IVW_fix	0.0109357	0.00357307	0.0039326	0.0179388	0.011 (0.004, 0.018)	0.00220905	102.775	0.83972	104.113	0.86	rs1800973, rs4411465, rs79173854
				IVW_random	0.0109357	0.00357307	0.0039326	0.0179388	0.011 (0.004, 0.018)	0.00220905
				Egger_slope	-0.00156138	0.00697643	-0.0152349	0.0121122	-0.002 (-0.015, 0.012)	0.822907
				Egger_intercept	0.00396367	0.00190047	0.000238831	0.00768851	0.004 (0, 0.008)	0.0370118
				Weighted_Median	0.00369528	0.00522607	-0.00654762	0.0139382	0.004 (-0.007, 0.014)	0.479513
2146	LS-BMD	90002074	SSC-A on CD14+ monocyte	IVW_fix	0.0164411	0.00772288	0.00130458	0.0315777	0.016 (0.001, 0.032)	0.0332636	63.3657	0.668636	65.0119	0.66	rs1800973, rs189866437, rs710794
				IVW_random	0.0164411	0.00772288	0.00130458	0.0315777	0.016 (0.001, 0.032)	0.0332636
				Egger_slope	0.0332914	0.0162508	0.00144043	0.0651423	0.033 (0.001, 0.065)	0.0405011
				Egger_intercept	-0.00435715	0.0036973	-0.0116037	0.00288943	-0.004 (-0.012, 0.003)	0.23861
				Weighted_Median	0.0151768	0.0114878	-0.00733897	0.0376925	0.015 (-0.007, 0.038)	0.186463
Causal effects(influenced by pleiotropic effects) of exposures in outcomes have been estimated repeatedly by random effects Inverse Variance Weighted (IVW), Weighted Median (WM), MR-Egger.
Traits that became insignificant after removing pleiotropic effect SNPs were marked in bold; warning p-values (showing heterogeneity/pleiotropy) are in red.
TB = total body,LS = lumbar spine, BMD= bone mineral density.
P = p-value, SE= standard error, Heter.est = Heter.estimate, Heter.P = Heterogeneity test p-value.
