# Supplementary material for: The immune factors have complex causal regulation effects on bone mineral density
Source: Frontiers journal article supplement (doi:10.3389/fimmu.2022.959417), 2022-10-20
Supplement: Data_Sheet_1.zip [file TableS8.xlsx]

## Sheet: Table S8
Table S8. The inverse causal associations between immune traits and osteoporosis phenotypes
Method	Trait ID	immune trait	BMD	BETA	SE	Down	Up	P	Heter.est	Heter.P
IVW_fix	90001658	CD39+ CD4+ %T cell	TB	-0.149805	0.0597869	-0.266985	-0.0326248	0.0122227	98.5489	0.437054
IVW_random	90001658	CD39+ CD4+ %T cell	TB	-0.149805	0.0602624	-0.267917	-0.031693	0.0129231	98.5489	0.437054
Weighted_Median	90001658	CD39+ CD4+ %T cell	TB	-0.190407	0.0899693	-0.366744	-0.0140708	0.0343143	NA	NA
The identified exposure and outcome were switched to explore the reverse causation in reverse MR analysis(IVW and WM).
TB = total body, BMD= bone mineral density.
P = p-value, SE= standard error, Heter.est = Heter.estimate, Heter.P = Heterogeneity test p-value.
