# Supplementary material for: The immune factors have complex causal regulation effects on bone mineral density
Source: Frontiers journal article supplement (doi:10.3389/fimmu.2022.959417), 2022-10-20
Supplement: Data_Sheet_1.zip [file TableS9.xlsx]

## Sheet: Table S9
Table S9. Mediation analysis of immune traits on osteoporosis with CD40 on monocytes
Outcome	Panel/type	Immune traits	Mediators	Mediation effect(95%CI)	Direct effect(95%CI)	Total effect(95%CI)			Mediators vs total
TB-BMD	B cell/MFI	CD27 on IgD- CD38-(late Bm5 memory cell)	CD40 on CD14+ CD16- monocyte	-0.009(-0.016,-0.003)	-0.002(-0.012,0.008)	-0.011(-0.020,-0.002)	-0.009	-0.011	0.818182
		CD27 on IgD- CD38-(late Bm5 memory cell)	CD40 on monocytes	-0.008(-0.015,-0.002)	-0.002(-0.012,0.008)	-0.011(-0.020,-0.002)	-0.008	-0.011	0.727273
		CD27 on IgD- CD38-(late Bm5 memory cell)	CD40 on CD14- CD16+ monocyte	-0.007(-0.013,-0.001)	-0.004(-0.014,0.006)	-0.011(-0.020,-0.002)	-0.007	-0.011	0.636364
		CD27 on IgD- CD38-(late Bm5 memory cell)	CD40 on CD14+ CD16+ monocyte	-0.008(-0.016,-0.002)	-0.002(-0.013,0.008)	-0.011(-0.020,-0.002)	-0.008	-0.011	0.727273
		CD27 on sw mem (CD27+IgD-)	CD40 on CD14- CD16+ monocyte	-0.006(-0.013,-0.001)	-0.006(-0.015,0.004)	-0.012(-0.020,-0.004)	-0.006	-0.012	0.5
		CD27 on sw mem (CD27+IgD-)	CD40 on CD14+ CD16+ monocyte	-0.008(-0.015,-0.001)	-0.004(-0.014,0.006)	-0.012(-0.020,-0.004)	-0.008	-0.012	0.666667
		CD27 on sw mem (CD27+IgD-)	CD40 on monocytes	-0.009(-0.016,-0.002)	-0.003(-0.013,0.006)	-0.012(-0.020,-0.004)	-0.009	-0.012	0.75
		CD27 on sw mem (CD27+IgD-)	CD40 on CD14+ CD16- monocyte	-0.009(-0.016,-0.003)	-0.003(-0.013,0.007)	-0.012(-0.020,-0.004)	-0.009	-0.012	0.75
		CD27 on IgD- CD38dim(early Bm5 memory cell)	CD40 on CD14- CD16+ monocyte	-0.007(-0.013,-0.002)	-0.003(-0.012,0.007)	-0.010(-0.018,-0.002)	-0.007	-0.01	0.7
		CD27 on IgD- CD38dim(early Bm5 memory cell)	CD40 on CD14+ CD16+ monocyte	-0.008(-0.015,-0.002)	-0.002(-0.012,0.008)	-0.010(-0.018,-0.002)	-0.008	-0.01	0.8
		CD27 on IgD- CD38dim(early Bm5 memory cell)	CD40 on monocytes	-0.009(-0.016,-0.002)	-0.001(-0.011,0.009)	-0.010(-0.018,-0.002)	-0.009	-0.01	0.9
		CD27 on IgD- CD38dim(early Bm5 memory cell)	CD40 on CD14+ CD16- monocyte	-0.009(-0.016,-0.002)	-0.001(-0.011,0.009)	-0.010(-0.018,-0.002)	-0.009	-0.01	0.9
		CD25 on IgD+	CD40 on CD14+ CD16- monocyte	0.004(0.000,0.009)	-0.014(-0.021,-0.007)	-0.010(-0.017,-0.002)	0.004	-0.01	-0.4
		CD25 on IgD+	CD40 on CD14+ CD16+ monocyte	0.006(0.001,0.013)	-0.016(-0.025,-0.007)	-0.010(-0.017,-0.002)	0.006	-0.01	-0.6
		CD25 on IgD+	CD40 on monocytes	0.007(0.002,0.013)	-0.017(-0.025,-0.009)	-0.010(-0.017,-0.002)	0.007	-0.01	-0.7
		CD25 on naive-mature B cell(CD24-CD38-/dim-)	CD40 on CD14+ CD16+ monocyte	0.004(0.000,0.011)	-0.022(-0.033,-0.011)	-0.018(-0.028,-0.007)	0.004	-0.018	-0.222222
		CD25 on memory B cell(CD24+CD38-/dim)	CD40 on CD14+ CD16+ monocyte	0.005(0.001,0.010)	-0.019(-0.030,-0.009)	-0.015(-0.024,-0.005)	0.005	-0.015	-0.333333
		CD25 on unsw mem (CD27+IgD+)	CD40 on CD14+ CD16+ monocyte	0.010(0.003,0.018)	-0.025(-0.036,-0.014)	-0.015(-0.024,-0.005)	0.01	-0.015	-0.666667
	Treg/MFI	CD28 on activated & secreting Treg	CD40 on CD14+ CD16+ monocyte	-0.003(-0.007,0.000)	-0.004(-0.011,0.003)	-0.006(-0.012,0.000)	-0.003	-0.006	0.5
		CD28 on activated & secreting Treg	CD40 on CD14- CD16+ monocyte	-0.003(-0.006,0.000)	-0.005(-0.011,0.002)	-0.006(-0.012,0.000)	-0.003	-0.006	0.5
		CD25 on secreting Treg	CD40 on CD14- CD16+ monocyte	-0.007(-0.016,0.000)	-0.010(-0.022,0.003)	-0.016(-0.028,-0.004)	-0.007	-0.016	0.4375
	Maturation stages of T cell/MFI	CD4RA on TD CD4+	CD40 on CD14+ CD16+ monocyte	-0.004(-0.009,0.000)	-0.004(-0.011,0.004)	-0.007(-0.015,0.000)	-0.004	-0.007	0.571429
		CD4RA on TD CD4+	CD40 on CD14- CD16+ monocyte	-0.005(-0.010,-0.001)	-0.003(-0.010,0.005)	-0.007(-0.015,0.000)	-0.005	-0.007	0.714286
	Treg/AC	Resting Treg AC	CD40 on CD14- CD16+ monocyte	-0.006(-0.012,0.000)	-0.013(-0.024,-0.002)	-0.019(-0.028,-0.009)	-0.006	-0.019	0.315789
		CD25hi CD45RA+ CD4 not Treg AC	CD40 on CD14- CD16+ monocyte	-0.005(-0.010,-0.001)	-0.005(-0.013,0.004)	-0.010(-0.018,-0.002)	-0.005	-0.01	0.5
	Treg/RC	Activated Treg %CD4 Treg	CD40 on monocytes	-0.005(-0.012,0.000)	-0.005(-0.013,0.034)	0.017(0.007,0.028)	-0.005	0.017	-0.294118
		CD25hi CD45RA- CD4 not Treg %CD4+	CD40 on CD14- CD16+ monocyte	0.010(0.002,0.019)	0.010(-0.013,0.016)	0.013(0.004,0.023)	0.01	0.013	0.769231
	Maturation stages of T cell/RC	TD CD4+ %CD4+	CD40 on CD14- CD16+ monocyte	-0.012(-0.022,0.004)	0.000(-0.003,0.005)	-0.018(-0.032,-0.005)	-0.012	-0.018	0.666667
FA-BMD	B cell/MFI	CD27 on IgD- CD38-	CD40 on CD14+ CD16- monocyte	-0.019(-0.039,0.002)	-0.059(-0.087,0.031)	-0.038(-0.072,0.003)	-0.019	-0.038	0.5
	Monocyte/MFI	CCR2 on CD14- CD16-	CD40 on CD14+ CD16- monocyte	0.037(0.001,0.080)	-0.085(-0.137,0.033)	-0.049(-0.092,0.005)	0.037	-0.049	-0.755102
	Myeloid cell/MFI	CD14 on CD33br HLA DR+ CD14dim	CD40 on CD14+ CD16- monocyte	0.016(0.002,0.037)	-0.059(-0.087,0.031)	-0.038(-0.072,0.003)	0.016	-0.038	-0.421053
TB = total body, FA = forearm, BMD= bone mineral density,MFIs, median fluorescence intensities, AC, absolute counts, RC, relative counts, MP, Morphological parameter.
